# Supplementary material
Source: PubMed Central journal article supplement (PMC4014839)
Supplement: supp_blood-2013-11-539643_Document1.pdf [file supp_blood-2013-11-539643_Document1.pdf]

Figure S1

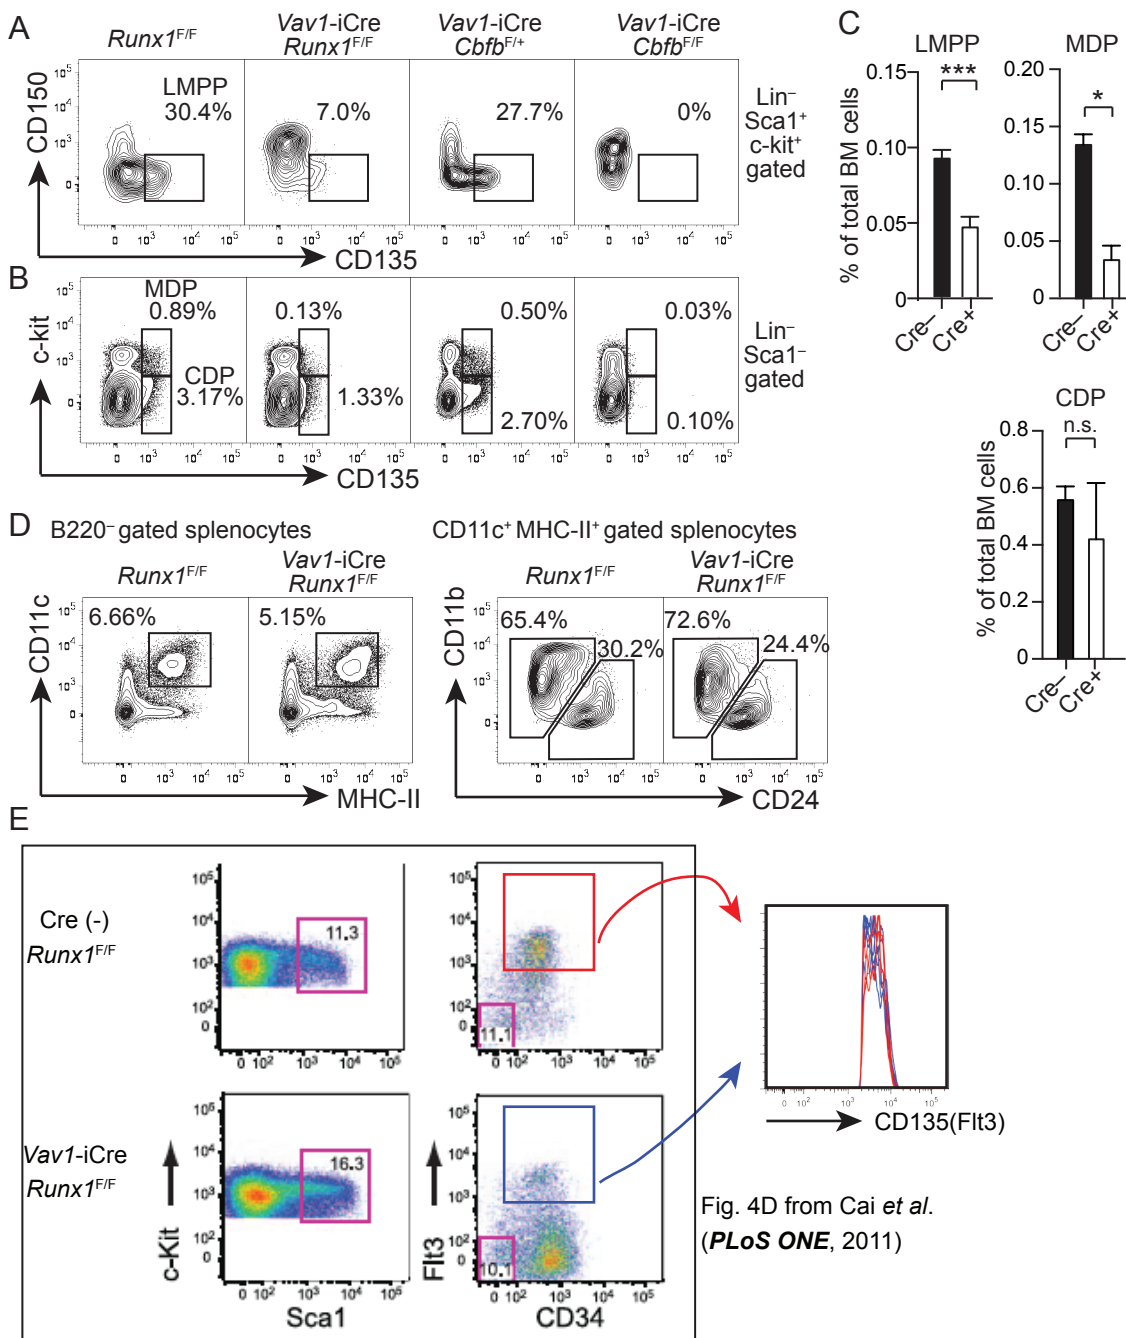

Fig. 4D from Cai *et al.* (*PLoS ONE*, 2011)

**Figure S1. *Runx1* is required for the normal development of Flt3<sup>+</sup> MDPs but dispensable for mature DC development.** (A - C) BM cells from *Runx1*-CKO (*Vav1-iCre<sup>+</sup> Runx1<sup>F/F</sup>*, Cre<sup>+</sup>) and control (*Runx1<sup>F/F</sup>*, Cre<sup>-</sup>) mice were analyzed for expression of lineage markers (B220, CD11b, MHC-II, CD16/32), c-kit, Sca1, CD150, and CD135 (Flt3). Frequencies of Flt3<sup>+</sup> Lin<sup>-</sup> Sca1<sup>+</sup> c-kit<sup>+</sup> (LMPP, A), Flt3<sup>+</sup> Lin<sup>-</sup> Sca1<sup>-</sup> c-kit<sup>+</sup> (MDP/CLP) and Flt3<sup>+</sup> Lin<sup>-</sup> Sca1<sup>-</sup> c-kit<sup>lo/lo</sup> (CDP) populations (B) are shown with rectangle gates. Data from *Vav1-iCre<sup>+</sup> Cbfb<sup>F/+</sup>* and *Vav1-iCre<sup>+</sup> Cbfb<sup>F/F</sup>* mice analyzed at the same time are shown for comparison. Statistical analysis from three mice is shown as mean and standard deviation in (C). (D) Splenocytes from *Runx1*-CKO (*Vav1-iCre Runx1<sup>F/F</sup>*) or control (*Runx1<sup>F/F</sup>*) mice were analyzed for expression of B220, CD11c, MHC-II, CD11b, and CD24. CD11c<sup>+</sup>MHC-II<sup>+</sup> cDCs in B220<sup>-</sup> gated splenocytes and CD11b and CD24 expression in cDCs are shown with rectangle gates and percentages. Data represents 6 mice per genotype. (E) Flt3 expression in *Runx1*-deficient LMPPs. A histogram overlay shows CD135 (Flt3) expression in LMPPs (Lin<sup>-</sup> Sca1<sup>+</sup> c-kit<sup>+</sup> Flt3<sup>+</sup>) from *Vav1-iCre<sup>+</sup> Runx1<sup>F/F</sup>* (blue histograms) and control Cre (-) *Runx1<sup>F/F</sup>* (red histograms) mice. Data shown in Figure 4D of Cai *et al.* (*PLoS ONE*, 2011;6(12):e28430) were reanalyzed.

Figure S2

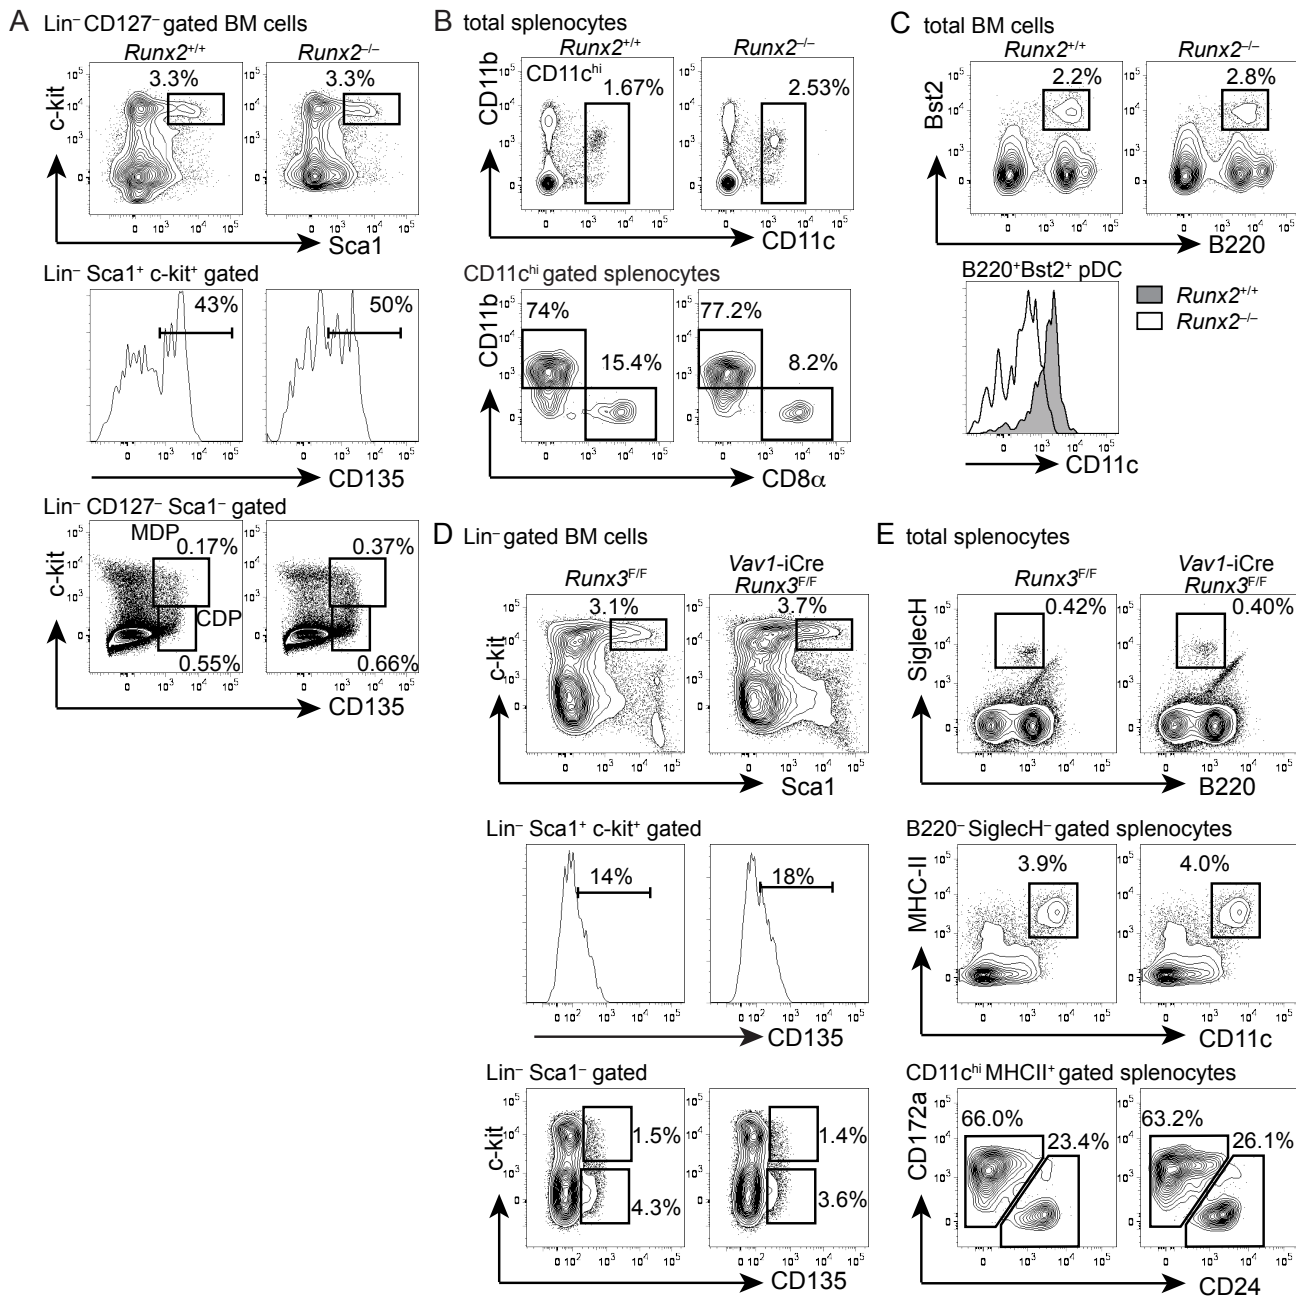

Figure

**S2. *Runx2* is required for CD11c expression in pDCs, but neither *Runx2* nor *Runx3* are necessary for cDC differentiation.** (A) Frequencies of MPP, LMPP, Flt3<sup>+</sup> MDP, and CDP populations in irradiation chimeric mice reconstituted with *Runx2*<sup>+/+</sup> and *Runx2*<sup>-/-</sup> fetal liver cells. Data represent analysis of four recipient mice per genotype. (B) Splenocytes from *Runx2*<sup>+/+</sup> and *Runx2*<sup>-/-</sup> fetal liver chimeras were analyzed for CD11b, CD11c and CD8 $\alpha$  expression. CD11c<sup>hi</sup> DCs are gated with rectangles in upper panels with percentages of total splenocytes. Bottom panels show CD11b and CD8 $\alpha$  expression in CD11c<sup>hi</sup> cells, and percentages of CD8 $\alpha$ <sup>-</sup> CD11b<sup>+</sup> DCs and CD8 $\alpha$ <sup>+</sup> CD11b<sup>-</sup> DCs are shown. (C) BM cells from *Runx2*<sup>+/+</sup> and *Runx2*<sup>-/-</sup> fetal liver chimeras were analyzed for B220, Bst2 and CD11c expression. Bst2<sup>+</sup> B220<sup>+</sup> pDCs are shown with rectangles and their percentages of total BM cells are shown. The histogram depicts CD11c expression in gated pDCs. Data is representative of 4 mice with similar results. (D) Frequencies of MPP, LMPP, Flt3<sup>+</sup> MDP and CDP populations in *Vav1-iCre Runx3*<sup>F/F</sup> and control Cre(-) *Runx3*<sup>F/F</sup> mice. (E) Splenocytes from *Vav1-iCre Runx3*<sup>F/F</sup> and control Cre(-) *Runx3*<sup>F/F</sup> mice were analyzed for expression of B220, SiglecH, MHCII, CD11c, CD24 and CD172a expression. B220<sup>int</sup> SiglecH<sup>+</sup> pDCs and B220<sup>-</sup> MHCII<sup>+</sup> CD11c<sup>hi</sup> cDCs are gated with rectangles with percentages in total splenocytes shown. Bottom panels show CD24 and CD172a expression in B220<sup>-</sup> MHCII<sup>+</sup> CD11c<sup>hi</sup> cells, and percentages of CD172a<sup>+</sup> (CD8 $\alpha$ <sup>-</sup> CD11b<sup>+</sup>) DCs and CD24<sup>+</sup> (CD8 $\alpha$ <sup>+</sup> CD11b<sup>-</sup>) DCs are shown. Data represent analysis of four mice per genotype with similar results.

Figure S3

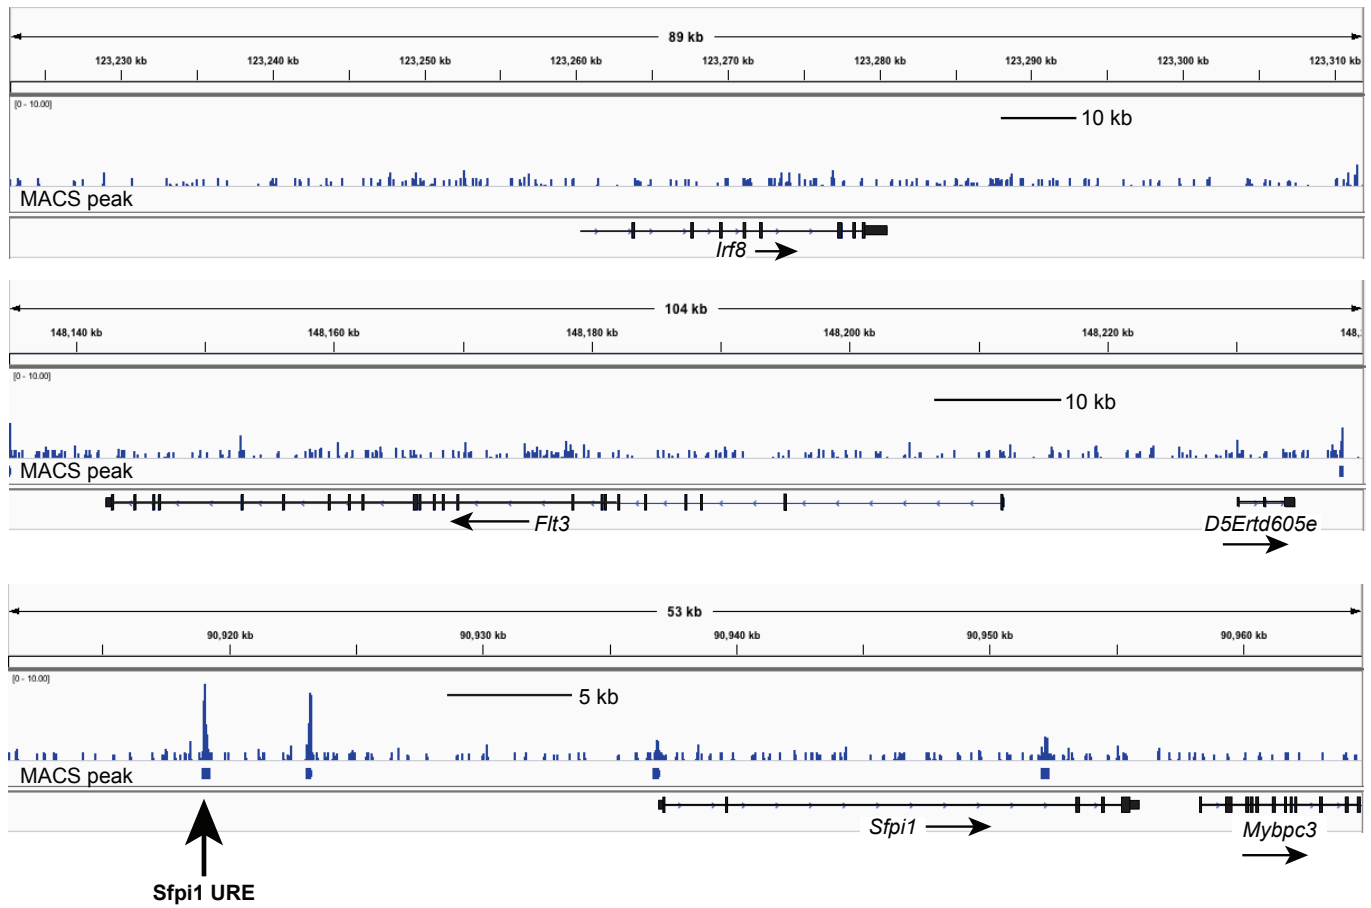

**Figure S3. Reanalysis of a published dataset of genome-wide Runx1 binding profiles in a murine hematopoietic progenitor model cell line.** Runx1 ChIP sequencing data from GSM552241 were mapped to the mouse genome mm9, and binding peaks were called using bowtie2-2 1.0 with a P-value of  $1 \times 10^{-6}$ . Histograms of Runx1-pulled binding tags encompassing *Irf8*, *Flt3* and *Sfp1* loci are shown.
